# Supplementary material
Source: publisher figshare collection journal article supplement (https://gsajournals.figshare.com/ndownloader/files/25467791)
Supplement: Supplementary file 1 [file 25467791]

## Sheet: Sheet1
Table S5. CUG codon frequency in GAL1, GAL7, and GAL10.
Species	clade	HGT?
babjeviella_inositovora	CUG-S
brettanomyces_anomalus	PIC	Y
brettanomyces_bruxellensis	PIC	Y
candida_albicans	CUG-S
candida_dubliniensis	CUG-S
candida_maltosa	CUG-S
candida_orthopsilosis	CUG-S
candida_parapsilosis	CUG-S
candida_sojae	CUG-S
candida_tanzawaensis	CUG-S
candida_tenuis	CUG-S
candida_tropicalis	CUG-S
clavispora_lusitaniae	CUG-S
debaryomyces_hansenii	CUG-S
geotrichum_candidum	DPT
hyphopichia_burtonii	CUG-S
kazachstania_africana	SMT
kazachstania_naganishii	SMT
kluyveromyces_aestuarii	SMT
kluyveromyces_dobzhanskii	SMT
kluyveromyces_lactis	SMT
kluyveromyces_marxianus	SMT
kluyveromyces_wickerhamii	SMT
lachancea_kluyveri	SMT
lachancea_lanzarotensis	SMT
lachancea_thermotolerans	SMT
lipomyces_starkeyi	LPC
lodderomyces_elongisporus	CUG-S
metschnikowia_bicuspidata	CUG-S
metschnikowia_fructicola	CUG-S
meyerozyma_caribbica	CUG-S
meyerozyma_guilliermondii	CUG-S
naumovozyma_castellii	SMT
naumovozyma_dairenensis	SMT
pachysolen_tannophilus	CUG-A
saccharomyces_arboricola	SMT
saccharomyces_cerevisiae	SMT
saccharomyces_eubayanus	SMT
saccharomyces_kudriavzevii	SMT
saccharomyces_mikatae	SMT
saccharomyces_paradoxus	SMT
saccharomyces_uvarum	SMT
saprochaete_clavata	DPT
scheffersomyces_stipitis	CUG-S
spathaspora_arborariae	CUG-S
spathaspora_passalidarum	CUG-S
starmerella_bombicola	DPT
tetrapisispora_blattae	SMT
tetrapisispora_phaffii	SMT
tortispora_caseinolytica	CUG-S
torulaspora_delbrueckii	TGP
vanderwaltozyma_polyspora	SMT
wickerhamomyces_anomalus	PHF	Y
yarrowia_lipolytica	DPT
yHMPu5000034635_nadsonia_fulvescens	DPT	Y
yHMPu5000034965_brettanomyces_naardenensis	PIC	Y
yHMPu5000034976_dekkera_anomala	PIC	Y
yHMPu5000034998_cephaloascus_albidus	CUG-S
yHMPu5000034999_cephaloascus_fragrans	CUG-S
yHMPu5000035269_wickerhamomyces_ciferrii	PHF	Y
yHMPu5000035273_wickerhamomyces_anomalus	PHF	Y
yHMPu5000035316_candida_homilentoma	CUG-S
yHMPu5000035682_hyphopichia_burtonii	CUG-S
yHMPu5000035720_candida_chilensis	CUG-S
yHMPu5000037913_candida_cylindracea	CUG-S
zygosaccharomyces_bailii	SMT
zygosaccharomyces_rouxii	SMT

## Sheet: GAL1_codon_counts
Clade	SeqName	UGA	UAG	UAA	GCU	GCG	GCC	GCA	UGU	UGC	GAU	GAC	GAG	GAA	UUU	UUC	GGU	GGG	GGC	GGA	CAC	CAU	AUU	AUA	AUC	AAA	AAG	CUA	CUC	CUG	CUU	UUA	UUG	AUG	AAC	AAU	CCA	CCC	CCU	CCG	CAA	CAG	AGA	AGG	CGA	CGC	CGG	CGU	AGC
CUG-A	pachysolen_tannophilus	0	0	1	17	0	2	13	11	1	30	1	7	31	21	6	25	4	1	5	0	9	21	4	4	33	15	3	0	4	3	29	17	5	5	12	7	0	10	3	5	4	8	6	0	0	0	2	4
CUG-S	babjeviella_inositovora	1	0	0	7	14	18	8	5	5	12	14	17	14	9	10	9	7	11	7	11	4	12	3	10	7	15	0	9	0	8	12	27	11	13	5	5	4	6	6	3	14	2	2	0	8	4	7	5
CUG-S	candida_albicans	0	0	1	13	0	4	10	8	0	32	5	6	18	15	9	13	6	2	9	1	8	23	6	5	33	4	0	0	0	3	23	30	9	16	24	7	1	9	0	21	2	5	0	2	0	0	2	6
CUG-S	candida_dubliniensis	0	0	1	13	0	6	9	7	0	33	3	5	21	17	7	16	7	1	6	2	8	25	6	6	29	6	0	0	0	3	25	28	11	11	28	5	2	8	0	22	3	6	0	2	0	0	2	5
CUG-S	candida_maltosa	0	0	1	15	1	9	6	8	0	25	5	4	27	6	17	15	5	2	9	1	8	17	2	17	27	7	0	2	0	5	18	22	9	13	20	7	2	4	4	13	4	11	0	1	0	0	3	0
CUG-S	candida_orthopsilosis	1	0	0	25	1	6	8	6	2	21	6	15	17	14	10	22	5	3	10	4	7	23	2	6	16	25	0	3	0	7	18	17	10	10	20	7	2	6	3	13	1	5	2	2	0	0	4	0
CUG-S	candida_parapsilosis	0	0	1	18	1	6	10	5	3	22	5	17	18	19	4	14	5	5	13	8	4	20	3	2	19	17	1	3	0	9	11	25	11	9	17	6	5	6	1	7	5	6	1	2	1	0	4	2
CUG-S	candida_sojae	0	1	0	18	0	2	6	7	1	31	1	2	31	19	5	20	4	0	14	2	10	28	4	5	22	14	0	1	0	5	18	19	11	14	22	8	1	7	2	9	2	7	3	0	0	0	5	0
CUG-S	candida_tanzawaensis	1	0	0	10	6	14	8	2	3	8	18	15	12	9	16	3	8	9	16	12	2	8	6	16	11	22	2	7	2	6	7	32	9	20	10	4	12	5	2	7	11	6	2	2	1	1	2	5
CUG-S	candida_tenuis	0	1	0	12	4	14	10	6	0	14	15	8	20	12	14	8	4	4	17	9	4	7	1	18	7	22	0	3	0	9	6	33	9	15	9	7	6	5	0	13	6	7	4	0	1	1	0	3
CUG-S	candida_tropicalis	1	0	0	9	1	3	8	6	0	19	4	3	25	15	7	13	3	3	5	2	11	21	5	5	20	11	1	2	1	5	14	11	9	9	19	9	0	7	0	9	2	8	1	0	0	0	3	3
CUG-S	clavispora_lusitaniae	1	0	0	10	5	8	6	3	5	3	9	10	9	5	10	2	2	10	9	3	4	10	2	7	6	16	0	4	2	7	2	17	3	14	3	7	2	7	1	2	1	4	0	2	2	1	1	3
CUG-S	debaryomyces_hansenii	0	0	1	17	0	5	10	4	1	27	8	4	28	16	12	20	4	3	7	4	8	20	3	10	24	15	2	1	0	1	28	17	6	11	14	11	1	7	0	9	4	12	2	0	0	0	2	4
CUG-S	hyphopichia_burtonii	0	0	1	9	0	5	13	6	4	21	3	5	32	17	7	18	6	1	8	1	7	21	4	3	24	10	1	2	2	5	36	17	4	9	25	12	3	4	1	15	3	10	3	2	0	0	1	2
CUG-S	lodderomyces_elongisporus	0	0	1	13	3	7	16	6	0	21	10	16	30	17	7	11	1	9	12	4	11	21	2	6	25	18	0	2	0	9	10	26	12	7	21	8	5	4	1	42	9	8	2	2	1	1	2	6
CUG-S	metschnikowia_bicuspidata	0	1	0	2	13	30	15	1	7	8	23	12	9	11	14	6	6	20	8	7	3	10	3	11	10	9	3	11	5	11	1	8	14	10	7	3	5	7	5	9	10	0	7	0	9	9	5	5
CUG-S	metschnikowia_fructicola	0	1	0	9	13	14	9	3	6	13	14	14	20	17	10	14	5	8	9	4	5	19	4	10	15	11	2	13	2	3	4	17	10	12	12	4	6	4	5	6	7	4	3	2	7	2	6	8
CUG-S	meyerozyma_caribbica	0	1	0	12	6	10	9	7	3	11	21	16	19	11	13	5	3	7	17	5	6	15	6	7	20	23	1	15	2	5	3	23	6	16	6	5	7	7	2	8	5	9	1	0	3	1	2	4
CUG-S	meyerozyma_guilliermondii	0	1	0	12	7	8	9	7	3	12	22	15	19	11	13	5	4	7	16	5	6	15	6	7	19	24	1	15	2	5	3	23	6	15	6	5	7	6	2	7	6	9	1	0	3	1	2	4
CUG-S	scheffersomyces_stipitis	0	1	0	21	1	7	10	6	1	7	17	18	25	7	19	13	0	4	14	8	3	17	3	10	10	33	2	3	1	4	9	33	7	19	8	7	3	10	0	11	2	11	1	0	1	0	0	3
CUG-S	spathaspora_arborariae	0	0	1	15	0	1	7	5	0	23	3	3	30	13	9	26	3	0	9	2	8	35	5	3	32	5	0	1	0	8	36	3	7	5	26	8	0	10	0	20	0	5	0	4	0	0	4	1
CUG-S	spathaspora_passalidarum	0	0	1	16	0	8	3	4	1	17	12	3	31	8	14	25	1	1	10	6	5	22	3	8	19	21	1	1	0	12	23	15	6	11	19	12	0	8	0	18	0	8	0	0	0	0	4	2
CUG-S	tortispora_caseinolytica	1	0	0	8	10	15	11	6	8	12	18	10	20	4	12	6	2	16	0	10	4	15	2	13	14	10	4	20	5	11	2	5	10	12	7	1	7	7	6	4	13	3	3	0	6	3	6	5
CUG-S	yHMPu5000034998_cephaloascus_albidus	0	1	0	23	0	7	6	7	1	20	3	5	29	5	18	25	0	0	2	1	10	9	4	20	28	9	1	0	0	4	30	16	6	18	16	13	1	4	0	12	3	10	0	0	0	0	1	1
CUG-S	yHMPu5000034999_cephaloascus_fragrans	0	1	0	18	1	8	6	7	1	7	9	14	27	13	11	24	2	4	1	7	5	18	6	10	18	15	0	1	1	2	28	15	6	17	16	10	1	6	0	11	6	8	1	1	0	0	2	4
CUG-S	yHMPu5000035316_candida_homilentoma	0	1	0	8	9	26	3	3	6	4	29	14	13	8	18	8	6	18	2	10	3	11	0	16	6	15	0	8	6	3	5	41	8	19	2	4	8	5	6	6	15	2	2	0	6	11	4	6
CUG-S	yHMPu5000035682_hyphopichia_burtonii	0	0	1	9	0	5	13	6	4	21	3	5	32	17	7	18	6	1	8	1	7	21	4	3	24	10	1	2	2	5	36	17	4	9	25	12	3	4	1	15	3	10	3	2	0	0	1	2
CUG-S	yHMPu5000035720_candida_chilensis	0	0	1	12	7	16	8	8	3	10	14	14	22	13	15	12	9	6	9	2	8	7	2	12	13	15	2	5	0	10	2	29	6	12	13	3	5	7	1	15	5	14	1	0	1	1	1	0
CUG-S	yHMPu5000037913_candida_cylindracea	1	0	0	7	17	25	8	3	5	0	22	32	3	8	10	3	5	25	0	15	0	6	0	8	1	20	0	17	21	4	0	25	10	12	0	0	17	4	8	0	12	1	0	1	13	6	1	10
DPT	geotrichum_candidum	0	1	0	18	12	25	3	2	3	5	22	32	7	13	12	7	1	23	2	9	2	13	0	11	3	23	3	23	16	7	0	6	8	23	6	3	21	2	1	1	8	1	1	2	14	0	5	5
DPT	saprochaete_clavata	0	1	0	17	3	16	9	5	5	18	17	15	27	21	4	12	4	7	9	4	7	17	1	9	22	25	2	13	6	19	12	15	11	17	10	10	3	12	2	21	3	5	0	5	5	1	5	2
DPT	starmerella_bombicola	0	0	1	15	6	9	6	4	7	17	10	14	13	7	17	11	7	8	7	10	3	7	5	10	19	11	5	9	6	8	4	17	9	8	10	6	5	9	4	11	13	3	3	3	3	2	5	13
DPT	yarrowia_lipolytica	0	0	1	7	5	15	2	4	5	8	21	20	7	6	10	4	2	12	15	6	5	12	0	9	4	25	0	15	27	6	0	4	11	19	3	2	8	5	7	4	14	2	2	4	1	3	2	5
DPT	yHMPu5000034635_nadsonia_fulvescens	0	0	1	17	5	16	5	7	5	20	9	10	24	20	10	21	2	9	4	5	5	14	2	6	13	16	10	5	7	3	7	15	13	8	11	4	10	6	1	13	6	7	3	2	2	2	3	1
LPC	lipomyces_starkeyi	1	0	0	5	16	23	12	4	5	6	17	16	21	13	13	15	2	15	6	6	5	13	1	10	10	14	4	15	9	6	3	11	10	10	5	10	7	6	2	6	11	0	1	3	7	5	6	5
PHF	wickerhamomyces_anomalus	0	0	1	13	1	8	5	8	1	22	5	4	23	12	19	22	3	1	3	1	10	22	3	11	37	3	6	5	2	3	29	14	7	12	28	12	3	3	1	23	0	7	0	0	0	0	2	0
PHF	yHMPu5000035269_wickerhamomyces_ciferrii	0	0	1	11	0	2	18	6	0	29	1	2	31	19	8	24	2	0	10	0	9	27	5	5	38	4	1	0	0	2	52	4	4	7	30	16	0	4	0	18	0	8	0	0	0	0	3	0
PHF	yHMPu5000035273_wickerhamomyces_anomalus	0	0	1	13	1	8	5	8	1	22	5	4	23	12	19	22	3	1	3	1	10	22	3	11	37	3	6	5	2	3	29	14	7	12	28	12	3	3	1	23	0	7	0	0	0	0	2	0
PIC	brettanomyces_anomalus	1	0	0	16	4	5	9	6	2	18	6	18	18	15	10	14	1	4	15	4	7	20	8	9	16	18	2	7	1	12	14	12	7	8	18	8	1	11	3	13	8	8	2	1	4	2	7	1
PIC	brettanomyces_bruxellensis	0	0	1	9	1	5	12	5	4	18	8	13	26	14	10	10	6	6	13	2	10	21	10	5	16	18	3	3	1	17	12	15	7	8	19	10	2	8	0	10	6	13	4	0	4	1	3	1
PIC	yHMPu5000034965_brettanomyces_naardenensis	1	0	0	10	1	9	8	3	3	19	7	19	19	10	15	11	0	7	18	3	6	14	3	12	9	21	8	5	3	7	6	24	5	15	11	6	6	9	5	9	5	12	5	2	0	2	2	8
PIC	yHMPu5000034976_dekkera_anomala	1	0	0	16	4	5	9	6	2	18	6	19	18	15	10	13	2	4	15	4	7	20	7	10	16	17	2	7	1	12	14	12	7	8	18	8	1	11	3	13	8	8	2	1	4	2	7	1
POOLED	Pooled	22	16	31	962	296	686	574	426	242	1076	722	735	1492	801	829	1064	216	438	473	297	405	1017	233	613	1125	1052	240	320	240	370	939	1195	577	832	903	595	261	418	130	786	347	511	142	77	149	83	216	214
SMT	kazachstania_africana	1	0	0	32	0	11	2	11	2	16	14	3	35	5	20	29	0	1	0	1	6	10	0	11	12	31	6	1	0	1	30	10	9	21	5	21	0	0	1	16	0	9	1	0	0	0	6	3
SMT	kazachstania_naganishii	1	0	0	16	4	21	5	9	4	4	25	12	21	9	13	24	3	5	0	3	4	8	1	15	15	31	6	0	4	2	2	33	8	16	11	14	0	8	1	5	4	10	0	0	0	0	3	2
SMT	kluyveromyces_aestuarii	0	1	0	8	5	5	12	8	6	17	9	11	23	15	10	18	4	3	12	2	6	22	6	5	16	12	7	1	6	7	17	11	10	10	14	12	6	5	1	13	2	11	4	1	0	1	3	1
SMT	kluyveromyces_dobzhanskii	0	1	0	12	6	8	7	10	4	16	9	18	23	12	14	18	5	6	6	5	4	21	4	4	19	9	15	2	3	4	12	18	8	14	13	9	4	5	4	10	5	7	1	0	3	0	6	2
SMT	kluyveromyces_lactis	0	1	0	16	5	6	5	11	4	16	9	6	35	11	16	27	1	2	4	4	6	14	3	9	10	18	10	2	2	1	10	28	8	9	16	15	0	6	2	13	5	8	1	0	1	0	5	3
SMT	kluyveromyces_marxianus	1	0	0	14	2	10	6	4	9	11	15	19	17	5	20	25	1	9	1	5	2	10	1	19	9	29	5	4	2	2	2	35	9	23	3	11	2	11	0	12	4	6	1	0	0	0	6	4
SMT	kluyveromyces_wickerhamii	0	1	0	8	6	7	6	8	7	10	12	19	23	8	21	16	2	14	3	6	6	8	1	23	8	25	9	2	4	3	5	30	8	13	9	13	3	6	3	8	8	5	4	0	1	0	5	0
SMT	lachancea_kluyveri	1	0	0	17	2	17	10	6	5	10	16	8	25	12	13	19	1	8	6	2	5	11	3	8	11	17	11	0	2	3	10	20	7	14	11	12	2	9	1	13	7	12	3	0	5	0	1	3
SMT	lachancea_lanzarotensis	1	0	0	8	13	14	13	4	6	15	13	14	18	13	13	16	7	10	6	6	3	9	6	6	11	14	7	3	10	10	5	8	13	12	9	7	6	6	2	11	9	4	6	4	5	2	3	5
SMT	lachancea_thermotolerans	1	0	0	5	16	12	10	5	6	7	18	19	13	9	16	5	4	12	12	6	4	7	7	6	9	15	4	4	20	9	4	6	10	14	9	4	8	6	3	15	13	6	6	3	7	4	0	7
SMT	naumovozyma_castellii	0	0	1	38	0	14	1	11	1	14	11	0	36	7	17	32	1	0	0	1	10	11	0	10	8	32	10	0	0	1	11	27	9	21	3	20	0	2	0	17	0	13	0	0	0	0	1	0
SMT	naumovozyma_dairenensis	0	0	1	11	1	3	19	14	0	29	2	6	30	11	13	18	3	2	5	0	11	14	9	7	27	5	7	5	2	2	28	11	9	6	21	15	2	8	0	17	3	12	2	3	0	0	2	1
SMT	saccharomyces_arboricola	1	0	0	12	6	12	13	7	5	19	13	10	23	13	13	13	2	12	3	5	7	12	5	7	16	10	4	7	7	4	10	16	8	8	21	5	8	5	4	13	4	12	5	3	2	2	2	1
SMT	saccharomyces_cerevisiae	0	0	1	12	7	16	10	4	8	23	6	7	23	17	13	12	3	6	7	5	8	11	7	8	22	9	12	4	3	5	12	9	10	6	24	7	2	10	4	11	5	12	5	3	2	0	3	3
SMT	saccharomyces_eubayanus	1	0	0	14	9	12	8	5	6	14	16	12	23	15	12	14	2	13	3	4	7	13	3	9	16	12	5	4	4	5	9	20	12	13	14	8	7	5	3	14	2	13	4	3	1	3	4	3
SMT	saccharomyces_kudriavzevii	1	0	2	1	0	2	0	4	2	0	1	1	2	3	1	0	0	0	0	0	1	2	0	0	2	3	1	1	0	0	0	4	1	0	2	2	0	0	0	3	1	2	0	0	0	1	0	0
SMT	saccharomyces_mikatae	0	0	1	22	2	8	8	9	5	14	10	7	29	16	11	22	4	3	3	2	9	15	2	7	20	17	9	1	2	4	20	12	11	13	17	16	4	8	0	11	2	10	3	0	1	0	3	1
SMT	saccharomyces_paradoxus	0	0	1	30	4	11	5	9	5	17	8	7	25	13	12	20	2	6	6	3	7	14	4	7	20	18	4	0	3	5	21	15	10	8	18	15	3	6	3	8	5	8	4	0	1	1	3	3
SMT	saccharomyces_uvarum	1	0	0	9	12	17	9	6	5	15	14	9	23	11	15	13	2	13	3	4	6	12	3	10	18	11	6	4	4	3	11	19	11	11	16	11	10	2	2	13	4	9	6	2	2	3	4	2
SMT	tetrapisispora_blattae	0	0	1	29	1	17	1	9	2	17	9	0	35	1	24	31	0	2	0	5	5	7	0	16	17	27	0	0	0	0	18	28	11	18	2	20	0	1	0	13	0	13	0	0	0	0	0	2
SMT	tetrapisispora_phaffii	0	0	1	32	0	4	5	10	2	21	6	6	28	10	14	30	0	3	0	1	7	19	1	4	19	18	4	1	0	1	29	8	11	14	14	17	0	2	0	11	1	11	0	0	0	0	2	3
SMT	vanderwaltozyma_polyspora	0	0	1	23	0	5	6	10	2	18	8	4	30	12	17	24	2	4	3	2	7	20	4	10	21	7	2	0	0	2	26	11	10	16	16	12	0	9	0	16	0	17	1	0	0	0	3	2
SMT	zygosaccharomyces_bailii	1	0	0	11	10	8	15	4	16	16	13	20	10	10	12	8	3	17	8	13	2	5	6	13	7	10	4	5	17	7	6	9	10	10	3	6	4	8	4	8	10	4	2	3	7	3	9	7
SMT	zygosaccharomyces_rouxii	0	0	1	14	3	5	19	10	9	17	5	9	26	14	7	15	3	7	9	8	2	11	8	8	7	11	7	4	3	10	13	10	12	9	10	9	2	11	2	13	7	6	6	2	4	0	10	5
TGP	torulaspora_delbrueckii	0	0	1	23	3	6	18	7	4	16	9	13	27	15	11	30	3	2	1	2	6	12	0	15	13	26	5	2	3	2	7	26	11	15	13	10	2	6	0	5	6	11	3	0	0	1	1	6
[truncated: 20 more columns]

## Sheet: GAL7_codon_counts
clade	SeqName	UGA	UAG	UAA	GCU	GCG	GCC	GCA	UGU	UGC	GAU	GAC	GAG	GAA	UUU	UUC	GGU	GGG	GGC	GGA	CAC	CAU	AUU	AUA	AUC	AAA	AAG	CUA	CUC	CUG	CUU	UUA	UUG	AUG	AAC	AAU	CCA	CCC	CCU	CCG	CAA	CAG	AGA	AGG	CGA	CGC	CGG	CGU	AGC
CUG-A	pachysolen_tannophilus	0	0	1	6	0	2	4	5	2	24	1	7	16	14	4	5	1	2	3	1	14	8	3	1	19	5	1	2	1	4	16	10	8	0	18	13	1	9	2	15	4	9	6	0	0	0	3	1
CUG-S	babjeviella_inositovora	0	1	0	1	7	6	4	3	3	13	14	15	9	5	13	4	4	4	1	11	5	2	1	5	4	19	0	5	0	6	3	19	9	10	4	8	2	6	9	2	14	9	1	0	6	1	4	4
CUG-S	candida_albicans	0	0	1	14	0	0	7	10	0	18	3	2	24	11	6	10	0	1	4	0	14	9	5	2	29	2	2	0	0	5	21	14	10	4	21	13	1	11	0	18	3	6	1	0	1	0	4	0
CUG-S	candida_dubliniensis	0	1	0	15	0	1	5	9	1	18	1	1	25	12	5	10	2	0	3	0	14	9	5	1	26	7	3	0	0	3	23	12	9	5	20	17	1	5	0	20	1	6	1	0	1	0	4	1
CUG-S	candida_maltosa	0	1	0	12	1	4	3	7	2	18	5	4	22	7	10	13	0	0	2	4	13	5	3	5	23	6	3	1	0	3	17	16	9	9	14	13	0	9	2	15	2	8	0	1	1	0	3	0
CUG-S	candida_orthopsilosis	0	1	0	11	1	3	4	3	7	17	7	8	18	9	9	7	3	2	3	7	9	9	4	2	18	11	1	3	0	4	11	20	9	13	11	14	2	7	1	11	4	6	5	0	1	1	0	0
CUG-S	candida_parapsilosis	1	0	0	6	0	5	7	6	4	13	8	7	20	12	6	4	3	4	3	8	9	10	2	3	13	17	0	2	0	6	11	20	10	9	12	8	4	5	7	13	3	6	2	1	1	0	1	0
CUG-S	candida_sojae	0	0	1	9	0	4	7	7	2	15	6	6	24	10	8	12	0	0	2	2	14	9	1	4	25	8	4	3	0	3	16	14	8	9	11	15	0	7	2	17	0	7	4	0	2	0	1	0
CUG-S	candida_tanzawaensis	0	1	0	6	3	6	3	3	6	6	15	12	14	7	12	3	3	7	6	14	3	2	2	6	8	18	0	15	0	3	0	19	10	21	1	5	8	5	6	2	15	3	4	1	3	2	5	3
CUG-S	candida_tenuis	0	1	0	8	3	8	5	6	2	11	13	8	16	6	13	3	4	2	9	7	9	6	1	3	13	17	2	1	1	2	15	21	10	20	5	6	9	9	1	8	6	12	1	0	0	2	2	1
CUG-S	candida_tropicalis	0	0	1	10	1	1	5	8	1	18	3	3	25	11	8	11	1	0	3	2	12	11	1	4	24	6	3	0	0	3	19	15	9	4	17	14	0	9	1	16	2	11	1	0	1	0	2	0
CUG-S	clavispora_lusitaniae	1	0	0	5	3	6	3	1	5	4	8	13	5	4	10	1	1	7	1	6	4	1	1	6	7	15	0	4	5	11	0	16	7	10	1	3	5	2	3	3	10	2	0	0	2	1	2	5
CUG-S	debaryomyces_hansenii	0	1	0	9	0	2	4	5	3	16	8	5	21	10	9	7	2	2	4	4	12	9	5	2	20	10	1	1	0	3	23	8	8	7	14	14	0	8	1	11	2	9	2	0	0	0	3	0
CUG-S	hyphopichia_burtonii_yHMPu5000035682_hyphopichia_burtonii	1	0	0	10	2	2	5	7	2	16	6	5	21	9	9	9	3	1	1	5	11	10	3	3	17	11	2	0	1	4	21	11	8	6	16	11	3	7	1	12	2	9	1	0	1	0	2	0
CUG-S	lodderomyces_elongisporus	0	1	0	6	1	2	7	5	6	12	11	10	14	10	8	6	2	5	2	5	9	6	3	1	22	9	4	7	1	5	9	15	10	13	8	13	3	5	3	12	8	7	3	0	1	0	1	2
CUG-S	metschnikowia_bicuspidata	0	0	1	6	5	8	14	3	4	13	4	11	17	10	9	2	4	5	4	9	7	1	2	1	14	8	1	3	5	7	5	23	7	9	5	7	4	9	3	6	7	3	3	1	2	1	3	4
CUG-S	metschnikowia_fructicola	0	1	0	4	13	11	7	4	3	8	10	12	14	11	9	5	5	7	1	9	4	3	2	4	11	13	1	7	5	6	5	16	7	13	4	10	4	4	5	7	9	3	3	0	1	2	3	6
CUG-S	meyerozyma_caribbica	2	0	2	9	4	6	13	8	6	14	11	10	17	13	12	7	2	6	11	10	10	7	6	4	16	18	0	9	3	6	6	17	11	8	10	9	7	8	5	7	11	11	1	0	1	0	5	4
CUG-S	meyerozyma_guilliermondii	2	0	2	9	5	5	13	8	6	13	12	10	18	12	13	7	0	6	11	11	10	7	6	4	16	18	0	9	3	6	6	17	11	8	10	9	7	8	5	6	11	11	2	0	1	0	5	4
CUG-S	scheffersomyces_stipitis	0	0	1	13	1	5	1	5	4	8	8	10	18	11	10	5	2	4	4	9	7	2	3	4	6	19	1	5	1	5	6	21	9	15	8	13	7	5	1	12	8	6	1	1	1	0	4	4
CUG-S	spathaspora_arborariae	0	0	1	11	0	0	5	9	0	17	0	3	25	15	3	7	2	1	5	1	17	13	3	1	20	7	0	0	1	5	34	2	10	2	17	9	0	14	0	17	1	7	0	3	0	0	3	0
CUG-S	spathaspora_passalidarum	0	1	0	9	0	4	5	8	1	14	6	5	25	8	9	7	3	1	5	7	9	6	4	3	14	14	0	2	1	3	21	14	9	14	5	10	1	11	1	14	2	7	3	1	1	1	2	2
CUG-S	tortispora_caseinolytica	1	0	0	8	9	4	10	2	7	15	7	12	10	2	12	2	1	3	4	6	7	3	4	9	7	9	2	5	3	4	2	8	12	7	6	5	4	11	8	5	11	7	0	1	4	1	8	0
CUG-S	yHMPu5000034998_cephaloascus_albidus	0	1	0	9	0	2	4	7	0	15	4	5	23	11	7	8	2	1	0	3	11	5	1	8	14	12	0	1	0	1	19	16	5	11	10	20	0	5	0	15	0	10	0	0	0	0	3	1
CUG-S	yHMPu5000034999_cephaloascus_fragrans	0	0	1	7	1	2	8	8	0	6	13	6	22	9	10	7	2	1	1	6	7	10	0	5	14	8	0	1	0	4	9	25	5	8	11	11	3	12	0	14	1	11	2	0	1	0	3	3
CUG-S	yHMPu5000035316_candida_homilentoma	0	1	0	3	1	22	1	4	5	1	22	14	9	1	15	4	3	5	5	12	2	4	2	8	8	21	0	4	1	3	0	28	9	20	4	5	6	7	6	1	11	1	2	0	3	3	4	3
CUG-S	yHMPu5000035720_candida_chilensis	0	0	1	2	5	9	1	6	2	8	14	14	12	6	14	5	2	4	2	4	9	4	0	4	9	14	2	10	0	6	3	17	6	11	3	4	8	5	8	8	10	9	1	1	3	4	1	2
CUG-S	yHMPu5000037913_candida_cylindracea	0	1	0	0	17	13	5	3	4	1	16	24	3	7	12	3	5	13	1	12	1	2	0	2	0	16	0	9	8	5	0	18	9	11	0	0	12	0	13	0	20	1	0	1	9	3	4	2
DPT	geotrichum_candidum	0	0	1	8	7	12	2	0	7	6	8	24	7	7	8	6	2	8	1	7	7	3	1	3	7	8	0	6	9	7	1	4	9	10	3	4	9	7	8	7	15	2	0	1	7	2	6	7
DPT	saprochaete_clavata	0	0	1	9	0	4	5	1	6	9	10	8	15	13	3	6	1	2	6	6	4	12	5	3	18	4	4	2	1	5	6	8	9	5	10	7	8	9	3	16	6	3	4	5	0	0	1	2
DPT	starmerella_bombicola	0	0	1	11	2	1	6	3	4	12	8	14	14	4	12	1	1	5	4	5	7	7	6	5	14	8	1	5	7	8	1	10	8	13	7	3	5	7	4	10	7	3	5	1	3	1	2	3
DPT	yarrowia_lipolytica	0	0	1	8	1	9	1	3	3	5	14	19	12	8	8	1	2	2	6	3	6	8	0	7	8	21	0	4	11	7	0	4	11	12	3	0	6	10	3	5	12	1	0	11	0	3	1	0
DPT	yHMPu5000034635_nadsonia_fulvescens	3	1	11	15	2	7	3	6	4	20	5	7	27	18	14	9	2	8	1	8	11	7	6	9	14	19	7	1	6	10	23	12	7	11	19	7	6	19	1	17	6	10	3	2	3	3	3	2
LPC	lipomyces_starkeyi	2	1	1	4	8	9	10	6	5	11	15	11	12	12	11	2	3	10	3	7	6	11	3	9	11	9	5	8	5	7	7	11	7	5	8	7	6	8	9	8	18	5	2	3	8	5	3	4
PHF	wickerhamomyces_anomalus_yHMPu5000035273_wickerhamomyces_anomalus	0	0	1	12	0	2	3	8	1	21	1	1	20	14	4	8	4	1	0	1	12	13	2	2	20	5	4	0	0	2	25	5	6	6	15	12	0	10	0	21	1	7	0	0	0	2	3	0
PHF	yHMPu5000035269_wickerhamomyces_ciferrii	0	0	1	13	0	1	4	7	0	20	3	0	23	14	5	12	1	0	3	0	14	9	2	1	23	6	1	1	0	3	28	7	6	3	19	13	0	10	0	19	1	7	0	0	0	0	3	0
PIC	brettanomyces_anomalus	0	0	1	4	1	7	6	6	4	10	9	15	12	14	7	12	1	4	4	3	11	6	4	6	18	16	0	2	0	20	8	9	4	4	12	11	2	6	2	7	5	10	3	0	0	0	0	1
PIC	brettanomyces_bruxellensis	0	1	0	11	0	7	6	5	6	14	5	9	21	13	8	11	1	1	5	5	9	7	4	4	14	16	4	4	1	13	5	12	4	4	12	12	1	6	2	5	6	10	4	1	0	1	0	0
PIC	yHMPu5000034965_brettanomyces_naardenensis	1	0	0	5	1	12	2	3	5	9	10	20	2	7	14	11	1	3	5	6	8	3	1	11	4	20	7	7	0	3	7	11	8	10	7	4	3	15	1	1	12	5	4	1	0	1	4	2
PIC	yHMPu5000034976_dekkera_anomala	0	0	1	4	1	7	6	6	4	11	7	15	12	14	7	11	1	6	4	3	11	6	4	6	18	16	1	2	0	19	8	9	4	3	13	11	2	6	2	7	5	10	3	0	0	0	0	1
SMT	kazachstania_africana	1	2	1	15	1	2	2	8	2	14	7	1	25	13	9	11	0	1	0	6	7	6	3	3	14	17	5	1	0	4	25	7	7	10	14	16	1	6	2	17	2	14	0	0	0	0	1	1
SMT	kazachstania_naganishii	0	1	0	8	4	4	9	4	2	12	10	12	13	10	10	12	2	0	1	6	7	6	1	3	17	13	3	1	6	3	2	22	6	9	7	13	2	5	2	8	6	10	3	0	0	1	1	2
SMT	kluyveromyces_aestuarii	0	0	1	11	2	4	9	6	1	18	5	12	19	7	10	5	2	6	2	3	8	7	4	2	21	8	8	4	3	1	9	10	7	3	14	14	2	6	3	5	8	6	5	0	1	1	4	1
SMT	kluyveromyces_dobzhanskii	1	0	4	8	3	6	10	8	2	13	9	14	26	12	15	7	2	3	8	9	9	10	11	4	10	15	2	5	5	7	13	10	7	9	14	13	4	9	4	12	6	11	4	2	2	2	3	4
SMT	kluyveromyces_lactis	1	0	0	10	0	7	7	3	5	13	6	10	23	3	15	12	1	1	2	5	10	4	0	6	17	7	4	4	1	3	13	15	7	9	9	18	1	4	0	11	5	11	2	0	2	0	2	2
SMT	kluyveromyces_marxianus	1	1	1	9	1	8	6	4	2	12	7	10	27	7	14	10	1	2	4	5	8	4	4	4	12	22	5	1	2	4	10	21	7	12	9	21	1	6	0	11	8	14	2	0	1	0	3	4
SMT	kluyveromyces_wickerhamii	0	1	0	7	0	5	5	5	2	16	6	10	20	9	10	6	1	6	4	0	13	5	3	3	13	15	9	0	3	0	13	9	5	8	12	16	3	6	1	15	3	9	1	0	1	0	2	4
SMT	lachancea_kluyveri	1	0	0	9	0	4	8	3	3	9	5	5	25	10	8	8	0	3	2	6	7	5	1	3	13	13	3	1	3	4	14	12	6	6	13	17	4	6	0	12	6	11	5	0	0	0	0	0
SMT	lachancea_lanzarotensis	0	0	1	10	6	2	7	0	7	9	10	10	17	12	8	3	2	3	6	6	7	5	1	1	16	12	6	0	10	9	3	8	5	11	8	10	5	5	3	8	5	11	1	0	2	2	1	8
SMT	lachancea_thermotolerans	1	0	0	8	3	5	9	3	5	13	5	12	15	13	12	5	3	3	3	8	3	7	5	2	14	9	3	4	7	4	8	11	9	11	10	7	4	6	7	9	8	4	7	1	1	2	2	2
SMT	naumovozyma_castellii	0	1	1	12	0	7	5	9	0	11	9	2	26	6	16	13	1	1	1	2	11	5	2	8	12	17	6	0	1	4	12	13	8	12	8	14	0	8	0	16	1	12	1	0	0	0	1	5
SMT	naumovozyma_dairenensis	0	0	1	16	0	1	5	8	0	11	5	1	30	5	15	15	2	0	0	4	11	7	0	6	16	9	2	0	0	2	18	10	9	7	14	20	0	2	0	17	0	14	1	0	0	0	1	1
SMT	saccharomyces_arboricola	0	0	1	11	0	10	2	4	2	14	6	6	17	10	9	9	0	5	0	4	10	10	4	1	16	10	5	2	3	3	14	9	9	8	12	9	6	9	2	14	2	12	1	2	0	0	1	2
SMT	saccharomyces_cerevisiae	0	0	1	12	1	6	2	4	2	16	2	7	17	12	6	10	0	2	0	3	10	10	2	4	14	9	7	3	4	3	12	9	6	6	17	12	3	8	0	15	4	14	2	0	0	1	2	3
SMT	saccharomyces_eubayanus	3	0	3	15	3	6	2	6	2	11	11	6	19	12	9	10	2	4	0	4	14	11	4	4	19	14	4	0	4	5	20	7	9	12	11	13	6	6	1	16	8	11	4	1	0	1	2	2
SMT	saccharomyces_kudriavzevii	0	0	1	3	0	1	1	0	0	2	0	0	3	3	1	1	1	1	0	0	1	0	2	0	1	0	0	0	1	1	3	0	2	1	2	2	0	1	2	0	3	5	0	0	0	0	2	0
SMT	saccharomyces_mikatae	0	0	1	11	2	5	4	6	0	14	4	11	15	12	7	10	1	2	1	2	12	8	3	4	16	14	4	2	2	2	13	14	7	8	17	8	6	7	3	11	6	9	3	1	0	0	1	1
SMT	saccharomyces_paradoxus	1	1	2	19	1	4	1	6	2	15	7	8	23	18	6	9	1	5	3	3	13	14	7	4	18	15	5	7	6	8	12	12	7	12	15	11	4	7	6	17	7	13	5	4	0	1	2	4
SMT	saccharomyces_uvarum	1	0	1	13	2	7	2	5	1	10	10	5	19	11	10	9	2	3	0	5	10	7	3	4	16	12	4	0	4	6	12	9	9	9	11	14	5	9	0	15	5	13	2	0	0	1	1	2
SMT	tetrapisispora_blattae	0	0	1	18	0	2	0	7	0	15	6	1	26	6	13	15	0	0	1	4	10	5	0	4	17	12	1	0	0	1	22	11	9	11	7	19	0	7	0	15	0	13	0	0	0	0	1	1
SMT	tetrapisispora_phaffii	0	0	1	16	0	3	4	6	1	13	6	5	26	7	11	11	1	1	0	1	14	7	1	3	17	11	6	0	2	1	19	8	8	4	11	14	1	4	1	15	0	12	1	0	0	0	1	0
SMT	vanderwaltozyma_polyspora	1	0	0	9	0	2	4	7	0	17	3	3	25	11	8	10	1	2	2	0	10	9	2	4	24	3	0	0	0	1	15	14	7	8	14	13	1	9	0	19	1	10	3	0	0	0	1	0
SMT	zygosaccharomyces_bailii	1	1	0	5	6	3	7	4	4	16	2	13	15	9	7	6	2	2	5	5	9	9	4	3	7	6	1	0	2	7	11	15	8	5	16	8	2	13	0	11	8	10	11	3	0	0	1	4
SMT	zygosaccharomyces_rouxii	0	0	1	11	3	2	6	5	2	16	2	5	26	14	5	5	4	3	5	3	10	8	4	2	11	9	3	0	2	6	15	10	7	5	13	6	2	13	2	14	4	12	6	0	0	0	0	2
TGP	torulaspora_delbrueckii	1	0	0	9	2	6	8	6	1	12	6	11	18	6	10	8	0	5	1	6	4	8	1	4	12	19	3	3	7	2	4	19	7	10	10	12	1	8	2	5	7	8	3	0	1	0	3	2
	Pooled	28	24	56	597	146	333	339	341	185	822	480	565	1179	629	610	484	114	208	194	329	587	442	183	257	949	777	166	189	158	321	752	839	505	569	682	690	214	486	170	718	385	539	151	51	80	52	150	131
[truncated: 20 more columns]

## Sheet: GAL10_codon_counts
clade	SeqName	UGA	UAG	UAA	GCU	GCG	GCC	GCA	UGU	UGC	GAU	GAC	GAG	GAA	UUU	UUC	GGU	GGG	GGC	GGA	CAC	CAU	AUU	AUA	AUC	AAA	AAG	CUA	CUC	CUG	CUU	UUA	UUG	AUG	AAC	AAU	CCA	CCC	CCU	CCG	CAA	CAG	AGA	AGG	CGA	CGC	CGG	CGU	AGC
CUG-A	pachysolen_tannophilus	0	0	1	20	1	2	14	7	0	34	5	11	27	18	17	43	5	1	11	5	11	32	4	8	31	12	2	2	3	6	26	20	4	14	43	15	0	14	0	11	1	16	8	0	0	0	3	2
CUG-S	babjeviella_inositovora	0	1	0	10	44	10	21	3	6	15	26	27	13	13	16	9	18	30	5	15	1	8	1	22	10	22	1	12	2	6	4	25	8	22	7	11	4	2	16	3	11	2	4	0	21	1	8	2
CUG-S	candida_albicans	0	1	0	21	1	4	14	7	1	39	8	7	35	20	19	35	4	1	14	3	11	32	3	11	42	8	0	0	0	3	20	27	6	17	37	16	2	6	0	14	0	14	0	0	0	0	8	1
CUG-S	candida_dubliniensis	0	1	0	17	0	6	15	7	1	35	9	5	37	21	16	31	6	7	12	4	10	32	7	9	37	10	0	0	0	3	22	25	6	15	42	15	2	8	0	16	1	13	1	0	0	0	8	0
CUG-S	candida_maltosa	0	1	0	25	0	15	4	7	2	41	10	2	36	16	21	34	2	1	17	3	17	28	2	12	42	11	0	0	0	1	23	25	7	19	33	22	0	3	2	12	0	17	0	0	0	0	4	1
CUG-S	candida_orthopsilosis	0	1	0	12	1	4	14	6	3	37	15	17	17	27	5	24	7	10	17	4	11	30	6	13	32	18	1	1	1	6	16	28	2	18	26	16	4	5	1	13	8	9	4	2	1	0	7	5
CUG-S	candida_parapsilosis	0	1	0	12	5	7	10	5	4	31	19	18	18	21	11	22	8	11	17	6	9	30	4	9	18	31	2	2	2	6	13	26	4	16	26	13	1	6	4	19	4	13	0	1	0	0	9	6
CUG-S	candida_sojae	0	0	1	17	0	12	15	8	2	38	10	3	34	24	12	32	4	5	14	3	13	31	2	14	37	13	0	1	0	5	22	21	9	25	26	22	0	3	1	16	0	16	1	0	0	0	5	2
CUG-S	candida_tanzawaensis	0	0	1	5	6	25	4	1	3	15	31	23	14	8	19	7	6	27	15	11	8	21	3	22	13	26	2	12	1	7	4	25	6	35	9	6	10	9	3	5	12	8	6	3	4	0	4	13
CUG-S	candida_tenuis	0	1	0	11	6	24	5	8	1	18	29	14	19	19	17	20	8	8	25	11	7	16	0	24	11	32	0	3	1	5	7	32	4	35	15	10	9	9	2	4	12	14	0	1	0	7	1	4
CUG-S	candida_tropicalis	0	0	1	17	0	12	12	9	1	35	13	1	40	17	19	33	3	5	13	5	10	30	2	10	38	13	0	0	0	7	19	24	9	28	28	21	0	4	0	12	1	14	0	0	0	0	6	1
CUG-S	clavispora_lusitaniae	0	1	0	12	3	10	8	0	4	8	22	12	16	8	15	6	1	21	19	7	7	18	0	20	15	16	0	7	1	6	2	20	3	28	9	11	4	4	3	6	5	10	0	2	4	0	2	10
CUG-S	debaryomyces_hansenii	0	0	1	17	4	4	11	4	3	39	7	5	40	22	16	31	7	3	10	4	14	30	9	11	35	14	1	2	0	5	27	18	5	14	47	16	1	7	0	6	1	20	3	0	2	0	1	1
CUG-S	hyphopichia_burtonii_yHMPu5000035682_hyphopichia_burtonii	0	1	0	28	0	6	8	4	1	35	11	6	27	19	15	33	3	3	7	3	12	29	7	12	33	13	1	1	3	11	25	14	4	19	35	18	1	12	0	15	1	13	2	0	1	0	7	4
CUG-S	lodderomyces_elongisporus	0	0	1	9	0	3	20	4	5	34	13	13	29	16	16	29	6	5	14	8	8	28	8	11	22	32	2	5	1	9	9	27	4	20	29	11	8	8	0	15	6	12	5	2	2	0	1	4
CUG-S	metschnikowia_bicuspidata	1	0	0	9	1	15	16	5	4	12	32	23	22	13	23	10	14	22	14	10	7	25	3	16	18	21	3	7	7	12	5	27	9	19	17	9	6	8	3	7	11	6	4	0	11	7	6	10
CUG-S	metschnikowia_fructicola	0	1	0	11	5	17	8	3	4	25	20	20	21	19	16	12	7	23	20	7	12	23	5	13	27	19	1	10	6	8	4	30	7	18	15	4	5	2	13	13	9	6	3	1	10	5	5	5
CUG-S	meyerozyma_caribbica	0	0	1	22	3	11	8	4	3	25	20	13	25	19	16	18	5	11	21	7	7	22	3	16	22	27	1	6	0	9	3	28	7	24	22	13	5	10	1	14	6	13	3	1	1	1	3	7
CUG-S	meyerozyma_guilliermondii	0	0	1	22	3	11	8	5	2	25	19	13	25	19	16	19	6	10	21	7	7	23	3	14	25	25	1	6	0	9	3	28	7	23	22	12	4	13	2	13	7	13	3	1	1	1	3	6
CUG-S	scheffersomyces_stipitis	1	0	0	19	0	18	4	6	0	17	30	14	25	6	31	31	1	14	10	13	7	16	0	26	5	40	1	9	1	4	10	29	4	36	8	16	1	15	1	7	8	17	3	0	1	0	2	4
CUG-S	spathaspora_arborariae	0	0	1	26	2	4	9	6	0	42	5	1	35	25	13	40	1	1	15	1	13	31	0	10	34	11	0	0	0	6	43	6	7	8	47	21	2	8	0	16	1	17	2	1	0	0	4	1
CUG-S	spathaspora_passalidarum	0	0	1	31	0	10	3	6	0	27	18	1	41	14	26	52	1	4	1	12	4	23	1	12	12	36	0	1	0	4	26	24	6	36	18	28	0	3	0	11	0	17	0	0	0	0	5	2
CUG-S	tortispora_caseinolytica	0	1	0	11	1	17	3	0	3	7	17	3	14	4	9	3	0	22	3	4	3	5	1	22	12	10	0	15	4	9	1	5	3	17	5	2	7	8	6	4	5	1	1	0	8	0	3	3
CUG-S	yHMPu5000034998_cephaloascus_albidus	0	0	1	21	0	6	4	6	4	32	12	5	33	13	22	43	2	5	5	4	8	19	5	21	40	13	0	2	0	2	36	18	4	24	31	17	1	8	1	13	3	15	0	0	0	0	2	4
CUG-S	yHMPu5000034999_cephaloascus_fragrans	0	1	0	23	1	3	6	8	2	35	12	8	31	24	12	44	1	6	4	6	8	31	3	15	39	14	0	5	0	4	25	29	4	27	27	15	0	10	0	13	3	14	2	0	0	0	3	2
CUG-S	yHMPu5000035316_candida_homilentoma	0	0	1	12	5	28	4	5	3	16	31	15	14	7	30	20	5	28	5	16	0	13	1	19	15	17	0	8	4	5	2	41	4	35	9	12	9	8	2	9	13	4	1	0	9	7	9	8
CUG-S	yHMPu5000035720_candida_chilensis	1	0	0	7	3	22	8	9	2	34	11	22	21	11	21	21	11	11	12	6	13	15	1	24	21	23	0	6	1	5	11	40	6	23	20	9	12	4	4	13	2	17	2	0	1	0	1	2
CUG-S	yHMPu5000037913_candida_cylindracea	0	0	1	10	18	31	5	2	7	1	36	39	3	9	15	8	8	48	7	19	1	9	0	23	0	26	0	16	15	7	0	26	7	28	0	1	18	1	17	0	20	0	0	1	24	9	1	15
DPT	geotrichum_candidum	0	0	1	5	5	11	5	0	2	4	19	18	7	8	3	12	1	15	2	5	2	15	0	8	3	20	0	7	12	10	1	2	3	15	1	4	12	3	2	0	6	2	0	0	14	0	4	1
DPT	saprochaete_clavata	0	1	0	12	2	10	3	3	1	14	11	5	19	9	3	9	3	10	7	5	5	12	2	8	10	11	1	9	0	13	1	10	5	11	6	8	6	6	2	6	1	10	3	1	4	0	4	0
DPT	starmerella_bombicola	1	0	0	3	6	11	9	2	2	6	15	10	9	6	6	5	3	15	5	8	3	9	1	10	6	15	0	10	7	10	0	4	5	14	4	3	8	5	3	2	2	1	3	2	5	2	3	5
DPT	yarrowia_lipolytica	0	0	1	13	2	11	2	2	4	9	14	20	7	6	5	11	1	8	13	9	3	9	0	12	4	15	2	9	12	6	0	0	5	17	2	2	14	5	1	0	9	2	0	15	1	1	1	2
DPT	yHMPu5000034635_nadsonia_fulvescens	0	1	0	20	5	16	3	8	4	32	14	7	32	20	17	28	6	16	9	6	12	26	6	18	20	26	5	2	4	7	22	19	9	23	26	3	8	12	3	11	5	9	4	4	3	2	4	4
LPC	lipomyces_starkeyi	0	0	1	3	8	8	7	2	1	4	13	17	8	3	10	9	1	20	4	4	3	6	1	17	6	13	3	15	3	2	1	3	5	15	5	6	8	3	5	2	2	1	2	3	5	0	4	2
PHF	wickerhamomyces_anomalus	0	0	1	15	1	6	9	4	0	29	10	5	29	21	16	38	2	4	7	1	14	28	6	29	34	5	15	3	0	3	18	12	4	14	44	18	3	7	0	25	1	16	0	0	1	0	2	1
PHF	yHMPu5000035269_wickerhamomyces_ciferrii	0	1	0	21	0	1	12	2	0	44	1	2	36	27	10	38	4	1	12	1	12	40	3	9	39	4	3	0	0	5	35	12	3	3	48	18	1	8	0	19	0	16	1	0	0	0	3	0
PHF	yHMPu5000035273_wickerhamomyces_anomalus	0	0	1	14	1	6	10	4	0	31	11	3	29	26	10	36	3	4	8	1	14	28	6	28	30	8	11	3	1	3	22	12	4	15	41	18	1	7	0	22	4	16	0	0	2	0	3	3
PIC	brettanomyces_anomalus	0	0	1	25	2	3	17	5	3	35	11	16	18	24	10	21	6	7	20	7	14	26	8	9	26	20	6	6	0	16	10	16	3	18	25	14	3	9	3	7	4	9	3	1	2	2	6	5
PIC	brettanomyces_bruxellensis	0	1	0	15	3	10	14	4	4	37	10	15	17	24	9	21	2	10	19	4	19	27	8	11	24	26	3	6	2	19	9	14	5	10	30	13	0	9	3	9	3	9	3	1	4	1	6	4
PIC	yHMPu5000034965_brettanomyces_naardenensis	1	0	0	17	3	18	5	3	2	19	28	26	9	11	24	19	1	16	25	14	9	9	2	20	3	39	14	18	0	5	3	16	4	25	14	8	4	12	8	0	8	6	8	1	2	3	6	3
PIC	yHMPu5000034976_dekkera_anomala	0	0	1	25	1	3	18	5	3	35	11	16	18	24	10	21	6	7	20	7	14	27	8	9	26	20	6	6	0	15	10	16	3	18	25	13	3	10	3	7	4	9	3	1	2	2	6	5
SMT	kazachstania_africana	0	0	1	24	2	5	10	7	4	28	15	6	44	8	18	52	0	5	3	6	13	24	5	15	16	27	2	2	0	4	35	12	8	22	25	23	1	8	2	13	3	19	0	0	1	0	5	1
SMT	kazachstania_naganishii	0	1	0	20	1	16	8	4	8	16	23	18	34	10	18	37	8	8	4	11	6	13	4	24	25	25	6	4	8	4	2	31	8	25	9	22	4	6	1	14	3	15	4	0	2	0	4	1
SMT	kluyveromyces_aestuarii	0	1	0	12	2	11	14	8	8	26	14	18	28	13	17	20	8	14	11	4	10	17	6	17	22	21	11	3	3	5	16	22	8	21	21	9	5	11	3	8	7	11	6	0	0	1	6	6
SMT	kluyveromyces_dobzhanskii	1	0	0	14	7	9	10	6	10	25	9	16	33	14	17	22	4	13	16	12	6	14	6	21	18	24	13	4	2	4	13	21	8	26	18	13	3	8	5	7	4	12	7	0	0	1	2	8
SMT	kluyveromyces_lactis	1	0	0	23	4	7	7	10	4	33	11	6	39	9	25	36	3	7	7	5	8	18	1	15	22	29	15	2	3	6	8	23	8	23	18	18	2	6	4	8	4	13	4	1	1	0	2	6
SMT	kluyveromyces_marxianus	0	0	1	18	0	17	8	3	11	18	33	18	24	5	28	41	0	8	3	11	3	13	0	24	4	46	7	1	1	3	5	41	8	28	10	30	1	7	0	9	5	14	1	0	0	0	4	8
SMT	kluyveromyces_wickerhamii	0	1	0	19	5	12	6	11	6	32	14	7	35	12	22	36	2	9	4	8	7	15	5	18	21	28	13	1	6	3	12	22	9	23	18	19	1	9	3	10	3	13	2	0	1	0	5	3
SMT	lachancea_kluyveri	0	1	0	20	1	9	11	7	3	25	17	16	20	19	11	36	2	10	8	7	10	18	5	12	25	15	11	2	4	2	19	24	7	21	23	13	6	6	4	11	6	10	8	0	3	0	5	6
SMT	lachancea_lanzarotensis	0	1	0	17	4	9	14	7	7	17	18	19	23	16	19	21	9	13	19	9	5	13	9	12	24	22	7	12	9	8	8	13	6	24	16	11	3	14	5	9	5	6	6	1	4	2	6	9
SMT	lachancea_thermotolerans	1	0	0	10	9	9	13	6	7	22	13	20	22	21	10	13	14	16	19	8	4	14	8	15	26	15	12	12	11	17	8	10	7	14	20	12	9	12	3	7	9	9	5	1	4	2	8	10
SMT	naumovozyma_castellii	0	0	1	27	0	12	9	9	2	37	9	0	40	5	19	45	3	3	7	6	11	28	0	20	20	26	11	0	0	0	13	34	5	28	11	29	1	2	0	16	0	18	0	0	0	0	7	1
SMT	naumovozyma_dairenensis	1	0	0	32	0	9	4	8	1	40	5	3	39	9	18	51	3	1	4	3	14	32	3	17	24	17	8	0	0	0	27	21	5	18	22	28	0	3	0	20	0	17	0	0	0	0	6	1
SMT	saccharomyces_arboricola	1	0	0	15	2	14	8	4	5	29	14	12	34	16	11	35	5	9	7	7	10	27	5	16	25	25	6	2	3	5	19	24	7	18	23	13	4	13	0	14	4	16	3	0	2	0	4	1
SMT	saccharomyces_cerevisiae	1	0	0	21	2	13	8	7	3	29	11	20	24	22	8	33	3	9	9	6	8	25	5	14	28	15	6	0	8	5	16	22	9	17	31	13	7	7	4	14	7	14	6	1	2	0	5	2
SMT	saccharomyces_eubayanus	1	0	0	19	3	18	7	6	2	29	16	10	31	19	8	43	3	10	2	6	11	29	1	13	21	31	6	1	8	6	14	24	6	12	26	19	3	5	4	13	5	16	4	1	0	2	5	1
SMT	saccharomyces_kudriavzevii	1	0	0	7	3	5	4	2	3	10	11	5	15	6	8	8	3	4	8	4	4	9	0	9	14	7	6	3	3	3	3	11	5	10	13	3	1	5	5	4	3	4	4	2	2	2	3	3
SMT	saccharomyces_mikatae	1	0	0	17	2	10	11	8	2	28	14	13	32	24	7	41	2	5	6	7	8	30	3	9	23	17	6	2	4	5	20	23	8	17	27	12	2	13	3	12	8	14	9	1	3	0	5	2
SMT	saccharomyces_paradoxus	0	0	1	19	4	12	8	5	2	28	11	16	28	21	9	33	3	14	5	5	9	29	6	13	29	16	4	1	10	6	15	20	9	19	28	14	6	12	1	12	7	13	9	0	3	1	7	5
SMT	saccharomyces_uvarum	1	0	0	19	3	17	6	7	2	26	19	10	33	15	12	41	4	9	3	6	10	29	1	14	22	29	4	2	8	4	17	23	5	12	27	18	3	7	4	12	6	15	5	0	0	2	5	2
SMT	tetrapisispora_blattae	0	0	1	25	0	18	2	8	0	40	3	0	50	7	21	50	1	2	2	5	12	21	0	26	25	26	2	0	0	2	29	26	8	28	13	27	0	3	0	16	1	24	0	0	0	0	4	0
SMT	tetrapisispora_phaffii	0	0	1	31	0	6	9	5	2	34	11	10	41	13	13	38	3	8	4	4	9	26	2	19	31	16	7	1	6	1	28	15	7	16	32	21	0	3	4	12	0	21	2	0	0	0	2	1
SMT	vanderwaltozyma_polyspora	0	0	1	23	1	6	6	10	0	31	8	8	47	19	9	42	3	7	1	1	10	32	6	16	38	14	11	0	3	2	28	15	7	13	41	19	0	9	0	15	1	20	1	1	0	0	2	1
SMT	zygosaccharomyces_bailii	0	1	0	10	8	9	16	8	2	23	13	11	24	16	10	22	5	14	15	8	10	13	13	12	14	14	6	4	13	13	10	13	8	14	21	11	8	9	6	12	9	10	6	4	4	1	9	10
SMT	zygosaccharomyces_rouxii	0	1	0	10	4	7	15	6	1	34	7	9	29	15	7	34	4	7	13	3	15	18	9	10	18	18	6	4	6	8	18	22	4	12	20	12	5	9	2	16	9	14	5	0	1	3	6	3
TGP	torulaspora_delbrueckii	0	1	0	22	2	9	12	7	5	23	18	23	28	15	16	28	8	7	11	8	10	25	4	10	23	19	8	2	8	8	9	28	6	18	25	14	3	13	1	12	2	12	1	0	2	0	12	2
	Pooled	15	24	27	1119	221	720	601	358	197	1734	996	795	1747	1010	978	1836	292	688	690	436	586	1444	242	1018	1475	1317	282	298	221	408	932	1364	390	1320	1462	933	265	494	179	706	311	787	186	58	181	68	302	253
[truncated: 20 more columns]
